# Supplementary material for: Three-dimensional carbon boron nitrides with a broken, hollow, spherical shell for water treatment
Source: Royal Society of Chemistry journal article supplement (doi:10.1039/c6ra10689g), 2016-01-01
Supplement: c6ra10689g1.pdf [file c6ra10689g1.pdf]

Supporting Information

## Three-dimensional carbon boron nitride with the broken hollow spherical shell for water treatment

Huichao Jia<sup>a</sup>, Jie Li<sup>a</sup>, Zhenya Liu<sup>\*a</sup>, Ruoyuan Gao<sup>a</sup>, Saleem Abbas<sup>a</sup>, Yi Fang<sup>a</sup>, Chao Yua, and Chengchun Tang<sup>\*a</sup>

<sup>a</sup> School of Material Science and Engineering, Hebei University of Technology,

Tianjin 300130, P. R. China.

\* Corresponding author. E-mail: [liuzhenya@hebut.edu.cn](mailto:liuzhenya@hebut.edu.cn) (Z. L.);

[tangcc@hebut.edu.cn](mailto:tangcc@hebut.edu.cn) (C. T.)

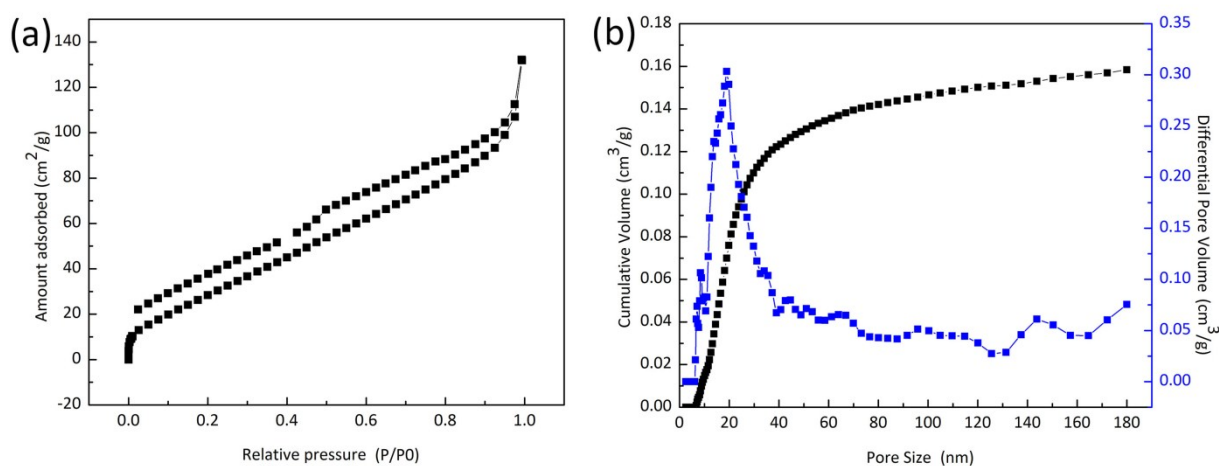

**Fig. S1** (a) Nitrogen adsorption - desorption isotherms of 3D C-BN. (b) The corresponding pore size distributions (blue line) and cumulative pore size distribution (black line).

Figure S1(a) displays the  $N_2$  adsorption-desorption isotherms of the sample. According to the International Union of Pure and Applied Chemistry classification, the isotherm and hysteresis loop belong to the type II isotherm and the H3-type loop, indicating that the majority of pores belongs to the family of mesoporous. The specific surface area of the 3D C-BN is  $134.4 \text{ m}^2/\text{g}$  and the pore volume is  $0.158 \text{ cc/g}$ . The 3D C-BN is mesoporous materials and its pore size is ranging  $5 \text{ nm} - 20 \text{ nm}$ .

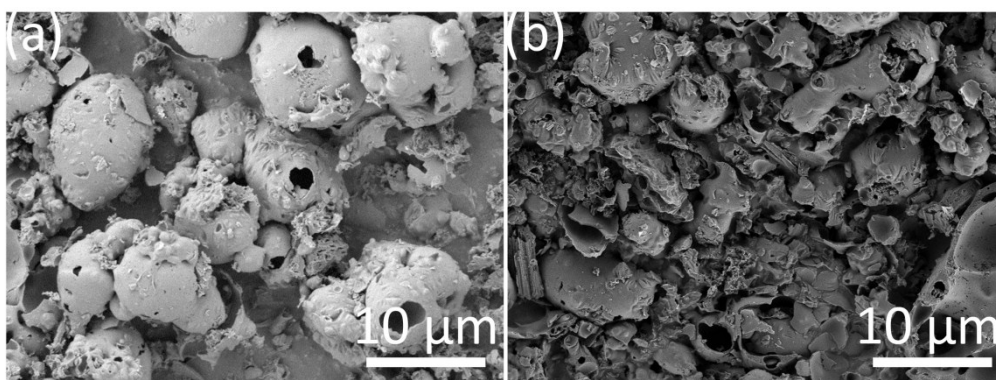

**Fig. S2** SEM images of the raw 3D C-BN sample (a) and the 8<sup>th</sup>-recycled sample (b).

Fig S2 displays the morphology of the raw 3D C-BN sample and the 8<sup>th</sup>-recycled sample. The hollow spherical shells in raw sample have been broken into pieces after several times reused.
